# Supplementary material
Source: publisher site journal article supplement (https://www.spandidos-publications.com/6594/downloadSupplementary)
Supplement: Supplementary file 1 [file downloadSupplementary]

Table S1. Fundamental terms for building search keywords.

| Key term             | Sub term                                                                                                                                                                                                                                                                                                                                                                                                                                         | Combined terms                                                                                                                                                                                                                                                                                                                                                                                                                                                                                                                                  |
|----------------------|--------------------------------------------------------------------------------------------------------------------------------------------------------------------------------------------------------------------------------------------------------------------------------------------------------------------------------------------------------------------------------------------------------------------------------------------------|-------------------------------------------------------------------------------------------------------------------------------------------------------------------------------------------------------------------------------------------------------------------------------------------------------------------------------------------------------------------------------------------------------------------------------------------------------------------------------------------------------------------------------------------------|
| Ovarian cancer       | “ovarian cancer” OR “ovarian neoplasms” OR “ovarian carcinoma” OR “ovarian malignancy”                                                                                                                                                                                                                                                                                                                                                           | (“ovarian cancer” OR “ovarian neoplasms” OR “ovarian carcinoma” OR “ovarian malignancy”) AND (“anti-miRs” OR “anti-miR” OR “anti-miRNA” OR “miR-Mimic” OR “miRs-Mimic” OR “mimic-miRs” OR “miRNA-mimic” OR “miRs antagonist” OR “miR antagonist” OR “miRNA-antagonist” OR “miRs inhibitor” OR “miRNA inhibitor” OR “miR inhibitor” OR “miRs mimics” OR “miRNA mimics” OR “miR mimics” OR “antagomiRs” OR “antagomiRNA” OR “antagomiR” OR “agonist MiRNA” OR “agonist MiRs” OR “agonist MiRs” OR “block MiRs” OR “block MiRNA” OR “block MiRNA”) |
| miRNA                | “anti-miRs” OR “anti-miR” OR “anti-miRNA” OR “miR-Mimic” OR “miRs-Mimic” OR “mimic-miRs” OR “miRNA-mimic” OR “miRs antagonist” OR “miR antagonist” OR “miRNA-antagonist” OR “miRs inhibitor” OR “miRNA inhibitor” OR “miR inhibitor” OR “miRs mimics” OR “miRNA mimics” OR “miR mimics” OR “antagomiRs” OR “antagomiRNA” OR “antagomiR” OR “agonist MiRNA” OR “agonist MiRs” OR “agonist MiRs” OR “block MiRs” OR “block MiRNA” OR “block MiRNA” |                                                                                                                                                                                                                                                                                                                                                                                                                                                                                                                                                 |
| miRNA/miR, microRNA. |                                                                                                                                                                                                                                                                                                                                                                                                                                                  |                                                                                                                                                                                                                                                                                                                                                                                                                                                                                                                                                 |

Table SII. Summary of exclusion reasons from the excluded studies.

| Exclusion reason                         | Count | %     |
|------------------------------------------|-------|-------|
| Cancer development and progression       | 149   | 67.12 |
| Did not focus on miRNAs                  | 24    | 10.81 |
| Did not using synthetic miRNAs           | 4     | 1.80  |
| Focusing outside of human ovarian cancer | 29    | 13.06 |
| Full text did not available              | 6     | 2.70  |
| Retracted                                | 4     | 1.80  |
| Review or methodological papers          | 6     | 2.70  |

miRNA, microRNA.

Table SIII. Cumulative observed-microRNAs from the eligible studies.

| No. | miRNA      | Associated diseases                                                                                                                         |
|-----|------------|---------------------------------------------------------------------------------------------------------------------------------------------|
| 1   | let-7b     | Melanoma and lung cancer                                                                                                                    |
| 2   | let-7d-3p  | Acute promyelocytic leukemia and ovarian cancer (let-7d)                                                                                    |
| 3   | let-7i     | Ovarian cancer and Alzheimer disease, familial, 1                                                                                           |
| 4   | let-7d-5p  | Acute promyelocytic leukemia and ovarian cancer (let-7d)                                                                                    |
| 5   | miR-106a   | T-cell acute lymphoblastic leukemia and glioma susceptibility 1                                                                             |
| 6   | miR-1246   | -                                                                                                                                           |
| 7   | miR-125b   | Pancreatitis, hereditary and pancreatic cancer (miR-125b-1)                                                                                 |
| 8   | miR-125b   | Down syndrome and pancreatitis, hereditary (miR-125b-2)                                                                                     |
| 9   | miR-1271   | Holoprosencephaly 5                                                                                                                         |
| 10  | miR-130a   | Lung cancer and Miyoshi muscular dystrophy 1                                                                                                |
| 11  | miR-133b   | Tongue squamous cell carcinoma and Parkinson disease, late-onset                                                                            |
| 12  | miR-137    | Oral squamous cell carcinoma and glioblastoma                                                                                               |
| 13  | miR-138-5p | Thyroid cancer, nonmedullary, 1 and oral squamous cell carcinoma (miR-138-1)                                                                |
| 14  | miR-138-5p | Pituitary adenoma and thyroid cancer, nonmedullary, 1 (miR-138-2)                                                                           |
| 15  | miR-139-5p | Leiomyoma, uterine and follicular lymphoma (miR-139)                                                                                        |
| 16  | miR-141    | Cholangiocarcinoma and renal cell carcinoma, nonpapillary                                                                                   |
| 17  | miR-142-5p | Brain cancer and multiple sclerosis (miR-142)                                                                                               |
| 18  | miR-145    | Vascular disease and Burkitt lymphoma (miR-145)                                                                                             |
| 19  | miR-149-3p | Pituitary adenoma and follicular lymphoma (miR-149)                                                                                         |
| 20  | miR-155-5p | Diffuse large b-cell lymphoma and pancreatic ductal adenocarcinoma (miR-155)                                                                |
| 21  | miR-182    | Glioblastoma and melanoma                                                                                                                   |
| 22  | miR-185    | Lung cancer and kidney cancer                                                                                                               |
| 23  | miR-186    | Lymphoma, Hodgkin, classic and multiple sclerosis                                                                                           |
| 24  | miR-194-5p | Coffin-siris syndrome 1 and branchiootic syndrome (miR-194-2)                                                                               |
| 25  | miR-199a   | Cell type cancer and gastrointestinal system disease (miR-199a-1)<br>Pancreatitis, hereditary and oral squamous cell carcinoma (miR-199a-2) |
| 26  | miR-200c   | Renal cell carcinoma, nonpapillary and endometrial cancer (miR-200c)                                                                        |
| 27  | miR-204    | Retinal dystrophy and iris coloboma with or without congenital cataract and cholangiocarcinoma                                              |
| 28  | miR-21     | Glioblastoma and oral squamous cell carcinoma                                                                                               |
| 29  | miR-21-3p  | -                                                                                                                                           |
| 30  | miR-211    | Melanoma and ovarian cancer                                                                                                                 |
| 31  | miR-214    | Cervical cancer and ovarian cancer                                                                                                          |
| 32  | miR-23a    | Hepatocellular carcinoma and heart disease                                                                                                  |
| 33  | miR-27a    | Leukemia and hepatocellular carcinoma                                                                                                       |
| 34  | miR-299-3p | Primary biliary cholangitis and Miyoshi muscular dystrophy 1 (miR-299)                                                                      |
| 35  | miR-302a   | Teratocarcinoma and oral squamous cell carcinoma                                                                                            |
| 36  | miR-302b   | Oral squamous cell carcinoma and embryonal carcinoma                                                                                        |
| 37  | miR-302c   | Non-gestational choriocarcinoma and 45,x/46,xy mixed gonadal dysgenesis                                                                     |
| 38  | miR-302d   | Testicular germ cell tumor and leukemia, acute myeloid.                                                                                     |
| 39  | miR-30c-2* | Scrotum squamous cell carcinoma and scrotal carcinoma                                                                                       |
| 40  | miR-31     | Oral cancer and ovarian cancer                                                                                                              |
| 41  | miR-324-5p | Medulloblastoma and primary biliary cholangitis (miR-324)                                                                                   |
| 42  | miR-34a    | Retinoblastoma and neuroblastoma                                                                                                            |
| 43  | miR-374a   | Lymphoma, Hodgkin, classic and squamous cell carcinoma, head and neck                                                                       |
| 44  | miR-375    | Lung cancer susceptibility 3 and diabetes mellitus                                                                                          |
| 45  | miR-376c   | Ovarian cancer and facioscapulohumeral muscular dystrophy 1                                                                                 |
| 46  | miR-383-5p | Pancreatitis, hereditary and embryonal testis carcinoma (miR-383)                                                                           |
| 47  | miR-424-3p | Leukemia, chronic lymphocytic and intrahepatic cholangiocarcinoma (miR-424)                                                                 |
| 48  | miR-484    | Autism spectrum disorder and systemic lupus erythematosus                                                                                   |
| 49  | miR-489    | Hypopharynx cancer and kidney cancer                                                                                                        |
| 50  | miR-503-5p | Adrenal cortical carcinoma and retinoblastoma (miR-503)                                                                                     |
| 51  | miR-532-3p | Melanoma and kidney cancer (miR-532)                                                                                                        |
| 52  | miR-551a   | Ovarian cancer and non-syndromic x-linked intellectual disability 21                                                                        |

|    |            |                                                                                                                                                                      |
|----|------------|----------------------------------------------------------------------------------------------------------------------------------------------------------------------|
| 53 | miR-591    | -                                                                                                                                                                    |
| 54 | miR-622    | Systemic lupus erythematosus and ovarian cancer                                                                                                                      |
| 55 | miR-630    | -                                                                                                                                                                    |
| 56 | miR-654-5p | Systemic lupus erythematosus and maxillary sinus cancer (miR-654)                                                                                                    |
| 57 | miR-7      | Pituitary adenoma and spermatogenic failure, x-linked, 1 (miR-7-1)<br>Kidney cancer (miR-7-2)<br>Pituitary adenoma and pancreatitis, hereditary (miR-7-3)            |
| 58 | miR-708    | Leukemia, acute lymphoblastic and pleuropulmonary blastoma                                                                                                           |
| 59 | miR-766-5p | Dental pulp disease and pulpitis (miR-766)                                                                                                                           |
| 60 | miR-873    | Glycine n-methyltransferase deficiency and lung cancer (miR-873)                                                                                                     |
| 61 | miR-9      | Oral squamous cell carcinoma and schizophrenia (miR-9-1)<br>Oral squamous cell carcinoma and glioblastoma (miR-9-2)<br>Breast cancer and pituitary adenoma (miR-9-3) |
| 62 | miR-93     | Myeloma, multiple and hepatocellular carcinoma                                                                                                                       |
| 63 | miR-98-5p  | Squamous cell carcinoma, head and neck and Niemann-Pick disease (miR-98)                                                                                             |
| 64 | miR-106a   | T-cell acute lymphoblastic leukemia and glioma susceptibility 1                                                                                                      |
| 65 | miR-210-3p | Cardiovascular system disease and head and neck cancer (miR-210)                                                                                                     |
| 66 | miR-29b    | Alzheimer disease, familial, 1 and aortic disease (miR-29b-1)<br>Rhabdomyosarcoma and leukemia, chronic lymphocytic (miR-29b-2)                                      |

---

<sup>†</sup>-<sup>‡</sup> indicates that the corresponding miRNA is not associated with any disease according to the database information at the time of extraction. The associated diseases for the corresponding miRNA are based on the gene mapping from The Human Gene database. miRNAs in brackets indicate miRNAs from the same family as the relevant miRNA, as identified on the Human Gene Database. The data was gathered in November 2023. miRNA/miR, microRNA.

---

Table SIV. Observed-miRNAs that were used to understand the treatment outcomes.

| No. | PMID     | miRNA of interest                      | anti-miR                                                                           | mimic-miR                                                                                                   | Therapy                    | Key findings related to miRNAs regulation                                                        |
|-----|----------|----------------------------------------|------------------------------------------------------------------------------------|-------------------------------------------------------------------------------------------------------------|----------------------------|--------------------------------------------------------------------------------------------------|
| 1   | 35371298 | let-7b                                 | x                                                                                  | let-7b mimics <sup>a</sup>                                                                                  | Paclitaxel                 | miRNA was downregulated in patients with therapy resistant ovarian cancer                        |
| 2   | 25556276 | let-7i                                 | anti-let-7i                                                                        | x                                                                                                           | Propofol                   | Downregulation of the miRNA was associated with therapy resistance                               |
| 3   | 30816441 | let-7d-5p                              | let-7d-5p inhibitors <sup>a</sup>                                                  | let-7d-5p mimics                                                                                            | Cisplatin                  | Downregulation of the miRNA was associated with therapy resistance                               |
| 4   | 24348845 | miR-106a                               | miR-106a inhibitors <sup>a</sup>                                                   | miR-106a mimics                                                                                             | Cisplatin                  | Upregulation of the miRNA was associated with therapy resistance                                 |
| 5   | 34476500 | miR-106a                               | miR-106a inhibitors                                                                | miR-106a mimics                                                                                             | Cisplatin                  | Upregulated miRNA improved therapy sensitivity                                                   |
| 6   | 23807165 | miR-106a; miR-591                      | miR-106a inhibitor <sup>a</sup> ; miR-591 inhibitor <sup>a</sup>                   | miR-106a mimic; miR-591 mimics                                                                              | Paclitaxel                 | Upregulation of miR-106a and downregulation of miR-591 was associated with therapy resistance    |
| 7   | 30487062 | miR-1246                               | anti-miR-1246 <sup>a</sup>                                                         | miR-1246 mimic                                                                                              | Paclitaxel                 | Downregulation of the miRNA improved therapy sensitivity                                         |
| 8   | 33836345 | miR-125b                               | miR-125b inhibitors                                                                | miR-125b mimics                                                                                             | Cisplatin                  | miRNA was notably downregulated in patients with chemoresistant ovarian cancer                   |
| 9   | 31411791 | miR-1271                               | miR-1271 inhibitors                                                                | miR-1271 mimics <sup>a</sup>                                                                                | Cisplatin                  | Upregulation of the miRNA improved therapy sensitivity                                           |
| 10  | 26396496 | miR-133b                               | anti miR-133b                                                                      | x                                                                                                           | Cisplatin and paclitaxel   | Downregulated miRNA was associated with therapy resistance                                       |
| 11  | 32349783 | miR-138-5p                             | miR-138-5p inhibitors                                                              | miR-138-5p mimics <sup>a</sup>                                                                              | Cisplatin                  | miRNA was associated with therapy resistance                                                     |
| 12  | 30439707 | miR-139-5p                             | anti miR-139-5p                                                                    | miR-139-5p mimics <sup>a</sup>                                                                              | Cisplatin                  | Upregulation of the miRNA improved therapy sensitivity                                           |
| 13  | 29719173 | miR-139-5p                             | miR-139-5p inhibitor                                                               | miR-139-5p mimics                                                                                           | Cisplatin                  | Upregulated miRNA improved therapy sensitivity                                                   |
| 14  | 34163033 | miR-142-5p                             | miR-142-5p inhibitors                                                              | miR-142-5p mimics <sup>a</sup>                                                                              | Paclitaxel                 | Downregulated miRNA was associated with a worse overall survival of patients with ovarian cancer |
| 15  | 25937243 | miR-145                                | miR-145 inhibitors                                                                 | x                                                                                                           | Quercetin                  | Upregulation of the miRNA improved therapy sensitivity                                           |
| 16  | 34798882 | miR-149-3p                             | miR-149-3p antagomiR <sup>a</sup>                                                  | miR-149-3p mimics                                                                                           | Cisplatin                  | Upregulation of the miRNA improved therapy sensitivity                                           |
| 17  | 23296900 | miR-182                                | x                                                                                  | miR-182 mimics                                                                                              | Cisplatin and paclitaxel   | Upregulation of the miRNA was associated with therapy resistance                                 |
| 18  | 33818283 | miR-185                                | miR-185 antisense                                                                  | miR-185 mimics <sup>a</sup>                                                                                 | Dexmedetomidine            | Upregulation of the miRNA improved therapy sensitivity                                           |
| 19  | 36617466 | miR-194-5p                             | miR-194-5p inhibitors                                                              | miR-194-5p mimics <sup>a</sup>                                                                              | Cisplatin                  | miRNA was downregulated in patients with therapy resistant ovarian cancer                        |
| 20  | 24137412 | miR-199a                               | miR-199a inhibitor                                                                 | miR-199a mimics <sup>a</sup>                                                                                | Cisplatin                  | Downregulation of the miRNA was associated with therapy resistance                               |
| 21  | 31898520 | miR-200c                               | x                                                                                  | miR-200c mimics <sup>a</sup>                                                                                | Olaparib                   | Upregulation of the miRNA was associated with therapy resistance                                 |
| 22  | 26025631 | miR-200c; miR-141                      | miR-200c inhibitors; miR-141 inhibitors                                            | miR-200c mimics <sup>a</sup> ; miR-141 mimics <sup>a</sup>                                                  | Carboplatin and paclitaxel | miRNA may serve a role as a tumor suppressor                                                     |
| 23  | 25845681 | miR-21                                 | miR-21 inhibitors <sup>a</sup>                                                     | miR-21 mimics                                                                                               | Icariin                    | Upregulation of the miRNA was associated with therapy resistance                                 |
| 24  | 32327705 |                                        | anti-miR-21 <sup>a</sup>                                                           | pre-miR-21                                                                                                  | Cisplatin                  |                                                                                                  |
| 25  | 24472409 |                                        | anti miR-21                                                                        | x                                                                                                           | Cisplatin                  | Downregulated miRNA improved therapy sensitivity                                                 |
| 26  | 28559385 | miR-214                                | miR-214 agomiR; anti-miR-214                                                       | x                                                                                                           | Radioresistance            | Upregulation of the miRNA was associated with therapy resistance                                 |
| 27  | 18199536 |                                        | antisense miR-214                                                                  | sense miR-214                                                                                               | Cisplatin                  | miR-214 may be an antiapoptotic factor                                                           |
| 28  | 20624637 | miR-27a                                | miR-27a inhibitors <sup>a</sup>                                                    | miR-27a mimic                                                                                               | Paclitaxel                 | Upregulation of the miRNA was associated with therapy resistance                                 |
| 29  | 32190895 |                                        | mir-27a inhibitors <sup>a</sup>                                                    | mir-27a mimics                                                                                              | Paclitaxel                 | Upregulation of the miRNA was associated with therapy resistance                                 |
| 30  | 28726915 | miR-299-3p                             | x                                                                                  | miR-299-3p mimics                                                                                           | Oleuropein                 | Upregulation of the miRNA improved therapy sensitivity                                           |
| 31  | 32835657 | miR-302a; miR-302b; miR-302c; miR-302d | miR-302a inhibitors; miR-302b inhibitors; miR-302c inhibitors; miR-302d inhibitors | miR-302a mimics <sup>a</sup> ; miR-302b mimics <sup>a</sup> ; miR-302c mimics; miR-302d mimics <sup>a</sup> | Cisplatin                  | Upregulation of the miRNA improved therapy sensitivity                                           |
| 32  | 22024689 | miR-30c-2*                             | antagomiR-30c-2*                                                                   | x                                                                                                           | Cisplatin and paclitaxel   | Downregulation of the miRNA was associated with therapy resistance                               |
| 33  | 26386726 | miR-31                                 | x                                                                                  | mimic miR-31 <sup>a</sup>                                                                                   | Cisplatin                  | Upregulation of the miRNA was associated with therapy resistance                                 |
| 34  | 29561664 | miR-34a                                | miR-34a inhibitors                                                                 | miR-34a mimics <sup>a</sup>                                                                                 | Cisplatin                  | Upregulation of the miRNA improves therapy sensitivity                                           |
| 35  | 26043084 | miR-374a; miR-130a                     | miR-374a inhibitors; miR-130a inhibitors                                           | miR-374a mimics <sup>a</sup> ; miR-130a mimics <sup>a</sup>                                                 | Cisplatin                  | Downregulated miRNAs were associated with therapy resistance                                     |

|    |          |            |                                |                                |                                          |                                                                                                 |
|----|----------|------------|--------------------------------|--------------------------------|------------------------------------------|-------------------------------------------------------------------------------------------------|
| 36 | 27129171 | miR-375    | exogenous miR-375 inhibitor    | x                              | <i>Emblica officinalis</i> /Amla extract | miRNA may be an oncogenic miRNA                                                                 |
| 37 | 30622051 | miR-503-5p | miR-503-5p inhibitors          | miR-503-5p mimics <sup>a</sup> | Paclitaxel                               | Upregulation of the miRNA improved therapy sensitivity                                          |
| 38 | 28345465 | miR-551a   | miR-551a agomiR; anti-miR-551a | x                              | Demethoxycurcumin                        | Upregulation of the miRNA improved therapy sensitivity                                          |
| 39 | 26774475 | miR-622    | antagomiR 622                  | mimic miR-622 <sup>a</sup>     | Carboplatin and cisplatin                | Upregulated miRNAs were associated with therapy resistance                                      |
| 40 | 32016960 | miR-654-5p | anti-miR-654-5p                | miR-654-5p mimics              | Paclitaxel                               | miRNA may be an oncomiR                                                                         |
| 41 | 29158814 | miR-7      | antagomiR-7 <sup>a</sup>       | miR-7 mimics                   | Cisplatin                                | Upregulated miRNAs were associated with therapy resistance                                      |
| 42 | 34425872 | miR-766-5p | x                              | miR-766-5p mimics              | Carboplatin                              | Upregulation of the miRNA improved therapy sensitivity                                          |
| 43 | 24168967 | miR-9      | miR-9 agomiR                   | miR-9 mimics <sup>a</sup>      | Cisplatin                                | Upregulation of the miRNA improved therapy sensitivity                                          |
| 44 | 25846738 |            | anti-miR-9                     | x                              | Cisplatin                                | Upregulation of the miRNA improved therapy sensitivity                                          |
| 45 | 26087719 | miR-93     | miR-93 inhibitors <sup>a</sup> | miR-93 mimics                  | Berberine                                | Upregulated miRNAs were associated with therapy resistance                                      |
| 46 | 31128026 |            | miR-93 inhibitors <sup>a</sup> | miR-93 mimics                  | Cisplatin                                | Study aimed to understand how L-Tetrahydropalmatine could improve therapy outcome via the miRNA |
| 47 | 30957179 | miR-210-3p | miR-210-3p inhibitors          | miR-210-3p mimics <sup>a</sup> | Cisplatin                                | miRNA may be an anti-oncogenic miR                                                              |
| 48 | 26099492 | miR-29b    | anti miR-29b                   | x                              | Oxymatrine                               | Upregulation of the miRNA improved therapy sensitivity                                          |
| 49 | 29452092 | miR-630    | miR-630 inhibitors             | x                              | Paclitaxel                               | Downregulated miRNA improved therapy sensitivity                                                |
| 50 | 30399596 | miR-383-5p | x                              | miR-383-5p mimics              | Paclitaxel                               | Upregulated miRNA improved therapy sensitivity                                                  |
| 51 | 31889899 | miR-98-5p  | miR-98-5p inhibitors           | miR-98-5p mimics               | Cisplatin                                | Upregulated miRNA reduced therapy sensitivity                                                   |
| 52 | 21823019 | miR-125b   | anti miR-125b                  | miR-125b mimics                | Cisplatin                                | Upregulated miRNA reduced therapy sensitivity                                                   |
| 53 | 30166592 | miR-137    | miR-137 inhibitors             | miR-137 mimics                 | Cisplatin                                | Upregulated miRNA improved therapy sensitivity                                                  |
| 54 | 31235732 | miR-211    | miR-211 inhibitor              | miR-211 mimics                 | Carboplatin                              | Upregulated miRNA improved therapy sensitivity                                                  |
| 55 | 24686007 | miR-489    | miR-489 antisense              | miR-489 mimics                 | Cisplatin                                | Upregulated miRNA improved therapy sensitivity                                                  |
| 56 | 28388577 | miR-204    | x                              | miR-204 mimics                 | Cisplatin                                | Upregulated miRNA improved therapy sensitivity                                                  |
| 57 | 25579119 | miR-21-3p  | x                              | miR-21-3p mimics               | Cisplatin                                | miRNA may be an oncomiR                                                                         |
| 58 | 28685895 | miR-708    | anti miR-708                   | miR-708 mimics                 | Cisplatin                                | Upregulated miRNA improved therapy sensitivity                                                  |

'x' denotes the corresponding study did not utilize the specified synthetic miRNA (either anti-miR or mimic-miR). <sup>a</sup>Synthetic miRs that could possibly improve therapy sensitivity, based on the corresponding study. However, it was not the main focus of the study to prove the causality of improvement on the therapy outcomes by using the mimic- or anti-miR. miRNA/miR, microRNA
